# Supplementary material for: The improved dynamic slicing for spectrum-based fault localization
Source: PeerJ Comput Sci. 2022 Sep 7;8:e1071. doi: 10.7717/peerj-cs.1071 (PMC9575932; doi:10.7717/peerj-cs.1071)
Supplement: Supplemental Information 1 [file peerj-cs-08-1071-s001.xls]

## Sheet: DS-Tanrutala
			% of code examined	% of faults located
			X	DS-Tarantula	D-Tarantula
			5	36.275	25.765
			10	58.745	37.588
			15	79.353	48.451
			20	85.255	68.986
			25	97.059	67.765
			30	98.039	76.627
			35	100	82.569
			40	100	85.471
			45	100	88.451
			50	100	88.373
			55	100	98.059
			60	100	100
			65	100	100
			70	100	100
			75	100	100
			80	100	100
			85	100	100
			90	100	100
			95	100	100
			100	100	100

## Sheet: DS-Naish1
		% of code examined	% of faults located
		X	DS-Naish1	D-Naish1
		0	0	0
		5	47.059	26.49
		10	59.824	41.157
		15	76.49	52.922
		20	88.235	61.725
		25	92.196	68.647
		30	96.078	72.569
		35	97.059	78.451
		40	98.039	78.951
		45	100	92.176
		50	100	95.118
		55	100	100
		60	100	100
		65	100	100
		70	100	100
		75	100	100
		80	100	100
		85	100	100
		90	100	100
		95	100	100
		100	100	100

## Sheet: DS_GP02
		% of code examined	% of faults located
		X	DS-GP02	D-GP02
		0	0	0
		5	40.216	22.569
		10	64.745	33.353
		15	75.529	47.078
		20	87.095	50.12
		25	95.118	66.686
		30	96.078	73.549
		35	97.029	78.451
		40	97.059	83.353
		45	99.01	85.314
		50	99.02	96.198
		55	100	100
		60	100	100
		65	100	100
		70	100	100
		75	100	100
		80	100	100
		85	100	100
		90	100	100
		95	100	100
		100	100	100
