# Supplementary material for: The improved dynamic slicing for spectrum-based fault localization
Source: PeerJ Comput Sci. 2022 Sep 7;8:e1071. doi: 10.7717/peerj-cs.1071 (PMC9575932; doi:10.7717/peerj-cs.1071)
Supplement: Supplemental Information 3 [file peerj-cs-08-1071-s003.xlsx]

## Sheet: Sheet1
	Subject	DS- Tarantula	D-Tarantula	DS-Naish1	D-Naish1	DS-GP02	D-GP02		DS- Tarantula	D-Tarantula	DS-Naish1	D-Naish1	DS-GP02	D-GP02
	jtcas	490	555	382	483	425	550	5115	0.0957967	0.108504	0.0746823	0.0944282	0.083089	0.107527	0.0127077	0.0197458	0.0244379	0.117117	0.20911	0.227273
	tot_info	260	450	276	450	280	480	2830	0.0918728	0.159011	0.0975265	0.159011	0.0989399	0.169611	0.0671378	0.0614841	0.0706714	0.422222	0.386667	0.416667
	schedule	150	165	140	145	162	200	2610	0.0574713	0.0632184	0.0536398	0.0555556	0.062069	0.0766284	0.00574713	0.00191571	0.0145594	0.0909091	0.0344828	0.19
	schedule2	159	597	210	501	216	525	2536	0.0626972	0.23541	0.0828076	0.197555	0.0851735	0.207019	0.172713	0.114748	0.121845	0.733668	0.580838	0.588571
	print_tokens	182	404	159	289	129	320	3346	0.0543933	0.120741	0.0475194	0.0863718	0.0385535	0.0956366	0.0663479	0.0388524	0.0570831	0.549505	0.449827	0.596875
	print_tokens2	211	400	216	421	184	408	2050	0.102927	0.195122	0.105366	0.205366	0.0897561	0.199024	0.0921951	0.1	0.109268	0.4725	0.486936	0.54902
	NanoXML v1	1350	1560	1101	1250	1208	1501	24479	0.0551493	0.0637281	0.0449773	0.0510642	0.0493484	0.0613179	0.00857878	0.00608685	0.0119694	0.134615	0.1192	0.195203
	NanoXML v2	820	990	762	810	792	880	24054	0.03409	0.0411574	0.0316787	0.0336742	0.0329259	0.0365844	0.00706743	0.00199551	0.00365844	0.171717	0.0592593	0.1
	NanoXML v3	1906	2221	1401	1561	1445	1800	36864	0.0517036	0.0602485	0.0380046	0.0423448	0.0391981	0.0488281	0.00854492	0.00434028	0.00962999	0.141828	0.102498	0.197222
	NanoXML v5	2100	2632	1629	2128	1922	2100	33474	0.0627353	0.0786282	0.0486646	0.0635717	0.0574177	0.0627353	0.0158929	0.0149071	0.00531756	0.202128	0.234492	0.0847619
	XML-sec v1	2200	3101	2400	2601	1901	2100	151291	0.0145415	0.0204969	0.0158635	0.017192	0.0125652	0.0138805	0.00595541	0.00132857	0.00131535	0.290551	0.077278	0.0947619
	XML-sec v2	1702	2150	1938	2201	2015	2108	119370	0.0142582	0.0180112	0.0162352	0.0184385	0.0168803	0.0176594	0.00375304	0.00220323	0.00077909	0.208372	0.119491	0.0441176
		11530	15225	10614	12840	10679	12972		0.0581363	0.0970231	0.0547471	0.0853811	0.055493	0.091371	0.0388868	0.0306339	0.0358779	0.400799	0.358791	0.392662
		version	the totle of the lines
	165	31	5115
	283	10	2830
	290	9	2610
	317	8	2536
	478	7	3346
	410	5	2050
	3497	7	24479
	4009	6	24054
	4608	8	36864
	4782	7	33474
	21613	7	151291
	19895	6	119370
